# Supplementary material for: Defect chemistry and lithium-ion migration in polymorphs of the cathode material Li2MnSiO4
Source: Royal Society of Chemistry journal article supplement (doi:10.1039/c3ta00111c), 2013-01-01
Supplement: c3ta00111c.pdf [file c3ta00111c.pdf]

## Electronic Supplementary Information

for *J. Mater. Chem. A*

**Title** Defect Chemistry and Lithium-Ion Migration in Polymorphs of the Cathode Material  $\text{Li}_2\text{MnSiO}_4$

*Craig A. J. Fisher\**, *Navaratnarajah Kuganathan*, and *M. Saiful Islam*

Table S1. (a) Pair potential parameters, (b) shell parameters, and (c) three-body parameters used in the simulation of  $\text{Li}_2\text{MnSiO}_4$ .

(a)

| Interaction                      | $A$ (eV) | $\rho$ (Å) | $C$ (eV.Å <sup>6</sup> ) |
|----------------------------------|----------|------------|--------------------------|
| $\text{Li}^+ - \text{O}^{2-}$    | 632.1018 | 0.2906     | 0                        |
| $\text{Mn}^{2+} - \text{O}^{2-}$ | 2601.394 | 0.2780     | 0                        |
| $\text{Si}^{4+} - \text{O}^{2-}$ | 1283.91  | 0.32052    | 10.66                    |
| $\text{O}^{2-} - \text{O}^{2-}$  | 22764.3  | 0.149      | 27.89                    |

(b)

| Species          | $Y$ (e) | $k$ (eV.Å <sup>-2</sup> ) |
|------------------|---------|---------------------------|
| $\text{Mn}^{2+}$ | 3.42    | 95.00                     |
| $\text{O}^{2-}$  | -2.86   | 74.92                     |

(c)

| Bonds                                            | $K$ (eV. rad <sup>-2</sup> ) | $\theta_0$ (°) |
|--------------------------------------------------|------------------------------|----------------|
| $\text{O}^{2-} - \text{Si}^{4+} - \text{O}^{2-}$ | 2.09724                      | 109.4          |

Table S2. Selected bond length and angle ranges for four polymorphs of  $\text{Li}_2\text{MnSiO}_4$ .

Experimental values are given in parentheses.

| Phase                   | Bond                         |                            |                              |                              |
|-------------------------|------------------------------|----------------------------|------------------------------|------------------------------|
|                         | Li1-O (Å)                    | Li2-O (Å)                  | Mn-O (Å)                     | Si-O (Å)                     |
| <i>Pmn2<sub>1</sub></i> | 1.95~2.02<br>(1.88~2.21)     | N/A                        | 2.06~2.10<br>(2.02~2.07)     | 1.63~1.64<br>(1.65~1.71)     |
| <i>Pmnb</i>             | 1.94~2.01<br>(1.93~2.03)     | N/A                        | 2.05~2.10<br>(2.03~2.21)     | 1.63~1.64<br>(1.62~1.69)     |
| <i>P2<sub>1</sub>/n</i> | 1.95~2.07<br>(1.90~2.04)     | 1.93~2.28<br>(1.92~2.14)   | 2.03~2.09<br>(2.01~2.09)     | 1.63~1.64<br>(1.65~1.66)     |
| <i>Pn</i>               | 1.97~2.15<br>(N/A)           | 1.92~2.16<br>(N/A)         | 2.03~2.08<br>(N/A)           | 1.63~1.64<br>(N/A)           |
| Phase                   | Angle                        |                            |                              |                              |
|                         | O-Li1-O (°)                  | O-Li2-O (°)                | O-Mn-O (°)                   | O-Si-O (°)                   |
| <i>Pmn2<sub>1</sub></i> | 107.2~113.5<br>(100.3~121.2) | N/A                        | 100.6~130.0<br>(105.7~122.7) | 106.4~111.6<br>(104.5~113.3) |
| <i>Pmnb</i>             | 95.8~117.8<br>(96.0~119.6)   | N/A                        | 102.3~129.2<br>(103.5~126.0) | 107.2~112.0<br>(104.5~125.7) |
| <i>P2<sub>1</sub>/n</i> | 95.9~117.3<br>(95.8~120.4)   | 87.8~124.9<br>(89.6~127.6) | 93.3~119.3<br>(92.8~118.3)   | 106.5~110.7<br>(107.5~111.7) |
| <i>Pn</i>               | 104.2~122.1<br>(N/A)         | 102.6~112.8<br>(N/A)       | 103.2~118.1<br>(N/A)         | 106.1~112.3<br>(N/A)         |
